# Supplementary material
Source: HighWire-hosted journal article supplement (https://bmjophth.bmj.com/content/8/1/e001493)
Supplement: inline-supplementary-material-1 [file inline-supplementary-material-1.pdf]

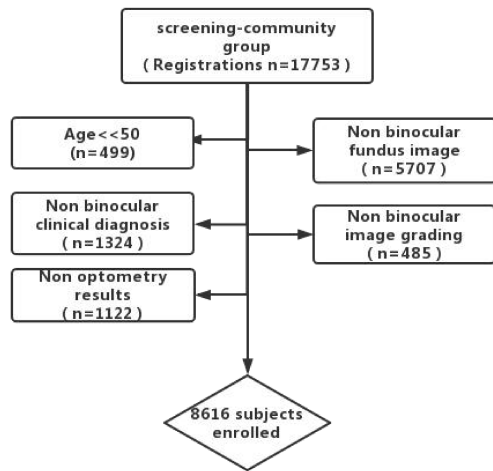

Supplemental Figure 1. Inclusion and exclusion diagram of study participants

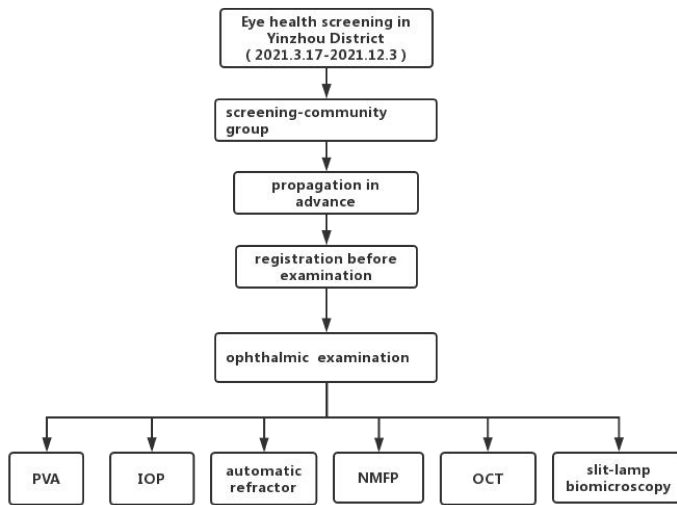

Supplemental Figure2. Glaucoma screening Flowchart
